# Supplementary material
Source: PubMed Central journal article supplement (PMC2753990)
Supplement: NIHMS101991-supplement-1.pdf [file NIHMS101991-supplement-1.pdf]

**HoxC4 binds to the *AICDA/Aicda* promoter to induce AID expression, class switch DNA recombination and somatic hypermutation**

Seok-Rae Park, Hong Zan, Zsuzsanna Pal, Jinsong Zhang, Ahmed Al-Qahtani, Egest J Pone, Zhenming Xu, Thach Mai & Paolo Casali

Institute for Immunology, School of Medicine and School of Biological Sciences, University of California, 3028 Hewitt Hall, Irvine, CA 92697-4120, USA.

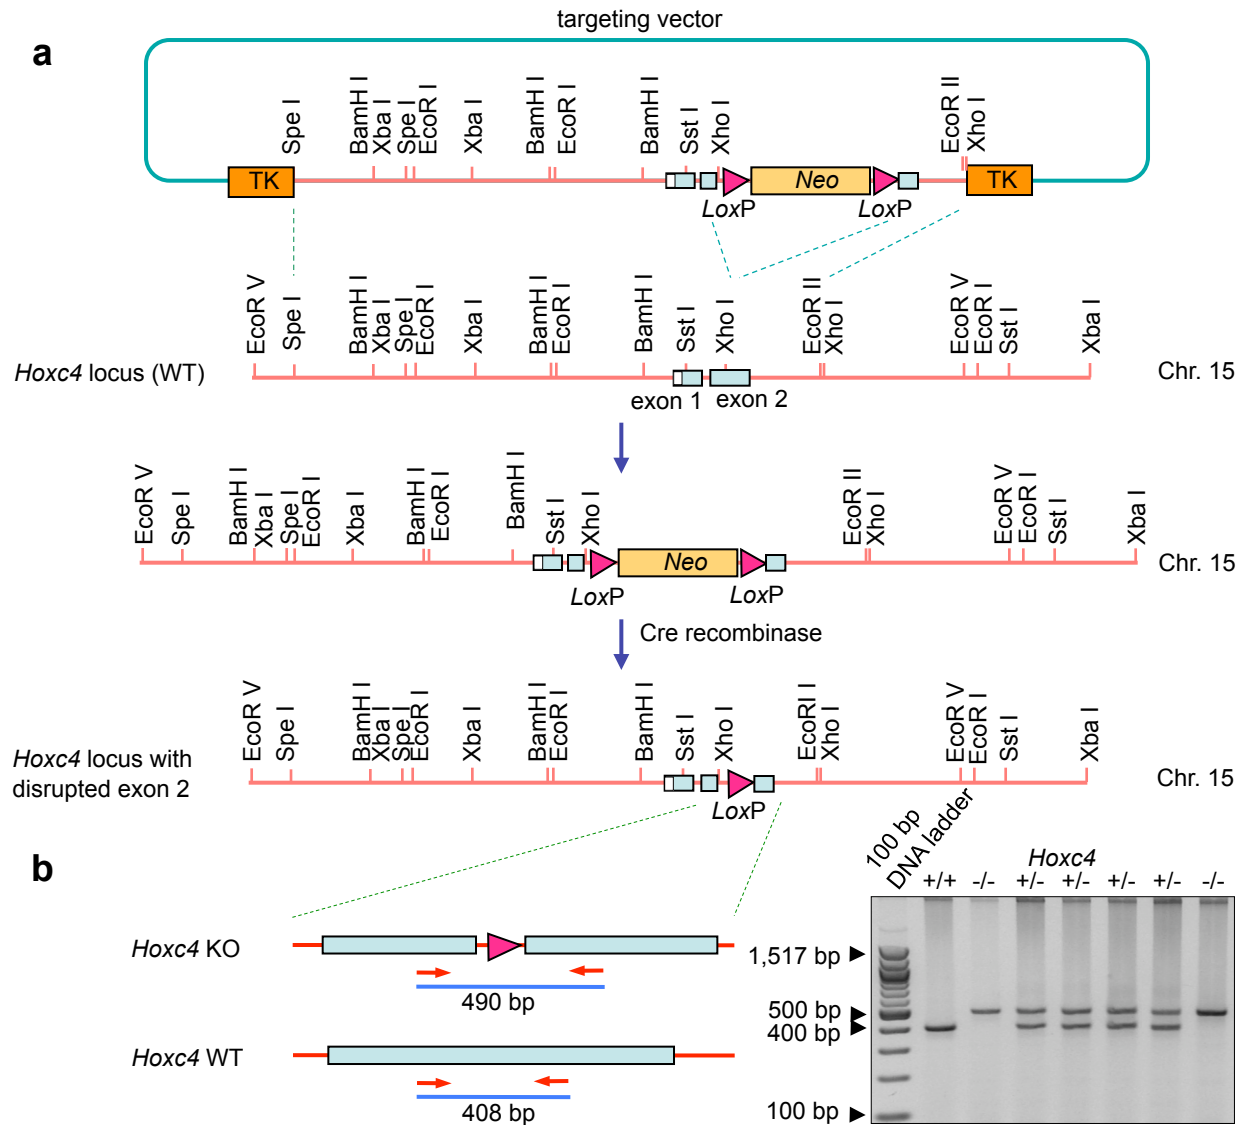

**Supplementary Figure 1.** (a) Construction of the *Hoxc4* knockout locus (adapted from A. M. Boulet and M. R. Capecchi, unpublished). A loxP-flanked *neo<sup>r</sup>* cassette was inserted in exon 2 of the *Hoxc4* gene at the *Xho* I site between the third and the fourth codons of the *Hoxc4* homeobox. This is the same insertion site as in the published *Hoxc4* knockout locus (Boulet and Capecchi, 1996. *Dev. Biol.* 177:232-249). Subsequently, the *neo<sup>r</sup>* cassette was removed by Cre recombination, so that only a single loxP site remains. This introduces a stop codon at the insertion site, yielding a nonfunctional truncated protein (lacking 95% of the homeodomain). (b) PCR analysis for the WT and genetically disrupted (KO) *Hoxc4* locus of the progeny from a cross between two *Hoxc4*<sup>+/-</sup> mice, using the forward and reverse *Hoxc4* primers (small red arrows) upstream and downstream of the insertion site, respectively. PCR of the WT *Hoxc4* locus generated a 408 bp product, PCR of the disrupted *Hoxc4* locus generated a bigger (490 bp) product, as it included the inserted loxP site. PCR products of WT and KO *Hoxc4* locus were verified by sequencing.

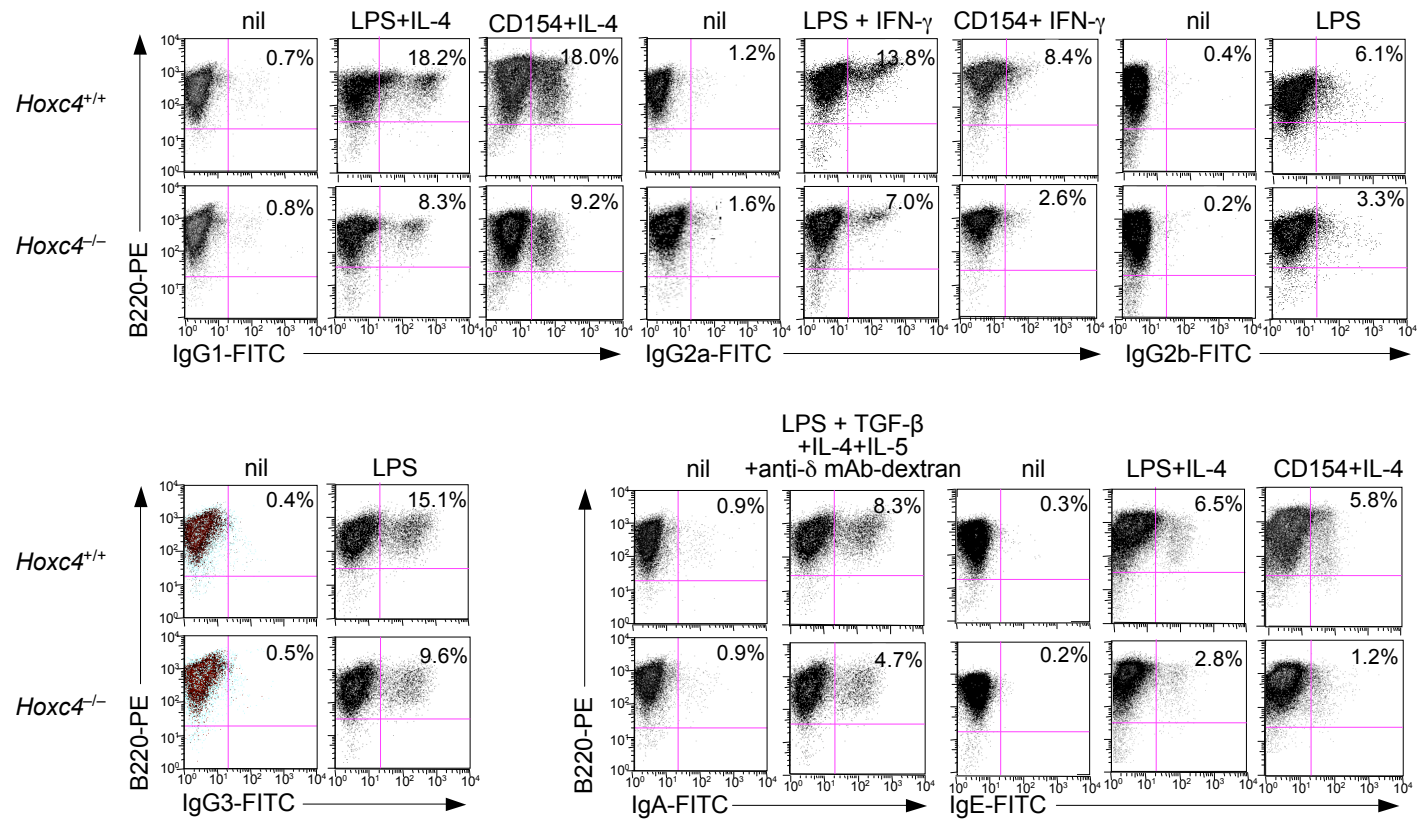

**Supplementary Figure 2.** Impaired CSR in *Hoxc4*<sup>-/-</sup> B cells. Spleen *Hoxc4*<sup>+/+</sup> and *Hoxc4*<sup>-/-</sup> B cells were stimulated with LPS or CD154 in the presence of nil (for IgG2b and IgG3), IL-4 (for IgG1 and IgE), IFN- $\gamma$  (for IgG2a), or TGF- $\beta$ 1, IL-4, IL-5 and anti- $\delta$  mAb-dextran (for IgA). After a 4-d culture, the cells were stained with PE-anti-mouse B220 mAb and FITC-anti-mouse IgG1, IgG2a, IgG2b, IgG3, IgA or IgE mAb for surface analysis (the number inside each panel indicates the percentage of B220<sup>+</sup> cells that are positive for the indicated Ig isotypes).

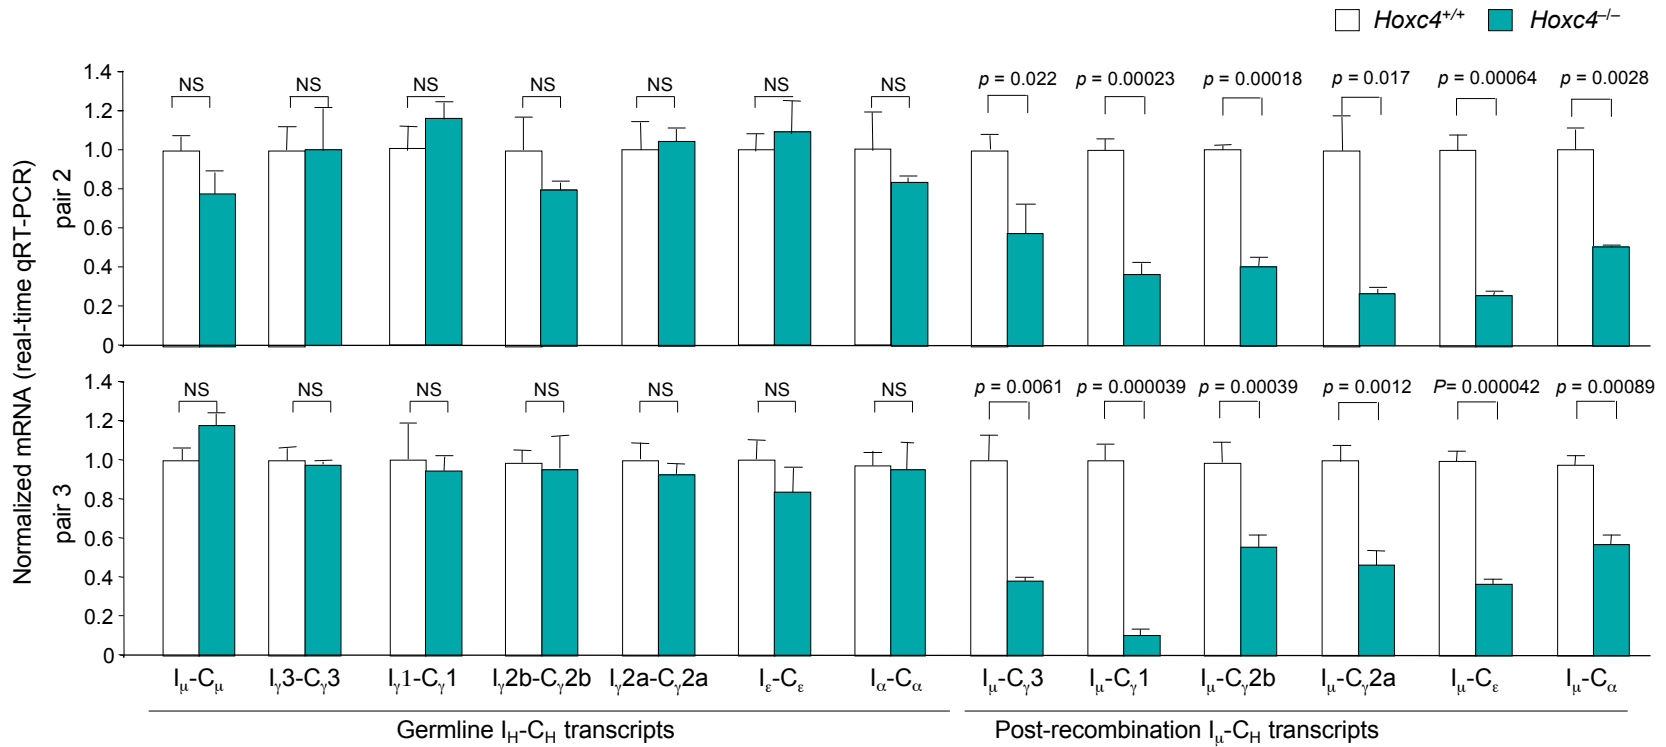

**Supplementary Figure 3.** HoxC4 deficiency does not alter the level of germline I<sub>H</sub>-C<sub>H</sub> transcripts but reduces post-recombination I<sub>μ</sub>-C<sub>H</sub> transcripts. Spleen *Hoxc4*<sup>+/+</sup> and *Hoxc4*<sup>-/-</sup> B cells were cultured with LPS or LPS and cytokines for 3 d and then harvested for RNA extraction. This was used as template in real-time qRT-PCR to measure the levels of germline I<sub>μ</sub>-C<sub>μ</sub>, I<sub>γ</sub>3-C<sub>γ</sub>3, I<sub>γ</sub>1-C<sub>γ</sub>1, I<sub>γ</sub>2b-C<sub>γ</sub>2b, I<sub>γ</sub>2a-C<sub>γ</sub>2a, I<sub>ε</sub>-C<sub>ε</sub> and I<sub>α</sub>-C<sub>α</sub> transcripts, and post-recombination I<sub>μ</sub>-C<sub>γ</sub>3, I<sub>μ</sub>-C<sub>γ</sub>1, I<sub>μ</sub>-C<sub>γ</sub>2b, I<sub>μ</sub>-C<sub>γ</sub>2a, I<sub>μ</sub>-C<sub>ε</sub> and I<sub>μ</sub>-C<sub>α</sub> transcripts, as normalized to *CD79b* expression. Values are mean Data are ± s.e. (bars) of two of triplicate samples. Data are from two of 3 pairs of *Hoxc4*<sup>+/+</sup> and *Hoxc4*<sup>-/-</sup> mice analyzed. Data from the third pair are depicted in **Fig. 5**.

**a**

|                             | pair 1 |    |    |    | pair 2 |     |    |    | pair 3 |    |   |     |    |    |    |    |   |
|-----------------------------|--------|----|----|----|--------|-----|----|----|--------|----|---|-----|----|----|----|----|---|
|                             | A      | G  | C  | T  | A      | G   | C  | T  | A      | G  | C | T   |    |    |    |    |   |
| <i>Hoxc4</i> <sup>+/+</sup> | A      | -  | 39 | 11 | 27     | A   | -  | 37 | 17     | 26 | A | -   | 35 | 13 | 23 |    |   |
|                             | G      | 46 | -  | 21 | 20     | G   | 35 | -  | 14     | 13 | G | 21  | -  | 16 | 17 |    |   |
|                             | C      | 14 | 7  | -  | 25     | C   | 9  | 2  | -      | 10 | C | 11  | 7  | -  | 16 |    |   |
|                             | T      | 14 | 11 | 37 | -      | 272 | T  | 10 | 12     | 23 | - | 208 | T  | 7  | 13 | 19 | - |
| <i>Hoxc4</i> <sup>-/-</sup> | A      | -  | 21 | 6  | 15     | A   | -  | 19 | 6      | 9  | A | -   | 13 | 3  | 6  |    |   |
|                             | G      | 17 | -  | 6  | 5      | G   | 12 | -  | 5      | 3  | G | 20  | -  | 10 | 9  |    |   |
|                             | C      | 0  | 0  | -  | 11     | C   | 2  | 3  | -      | 12 | C | 7   | 1  | -  | 4  |    |   |
|                             | T      | 5  | 3  | 16 | -      | 105 | T  | 7  | 0      | 10 | - | 88  | T  | 6  | 2  | 8  | - |

**b**

| <i>Hoxc4</i> <sup>+/+</sup> |   |      |     |      |     | <i>Hoxc4</i> <sup>-/-</sup> |         |   |      |     |      |     |      |      |         |
|-----------------------------|---|------|-----|------|-----|-----------------------------|---------|---|------|-----|------|-----|------|------|---------|
|                             |   | to:  | A   | G    | C   | T                           | % total |   |      | to: | A    | G   | C    | T    | % total |
| Mutations from:             | A |      |     | 16.4 | 6.1 | 11.2                        | 33.7    | A |      |     | 18.8 | 5.3 | 10.6 | 34.7 |         |
|                             | G | 15.3 |     |      | 7.6 | 7.5                         | 30.4    | G | 17.4 |     |      | 7.4 | 6.0  | 30.9 |         |
|                             | C | 5.1  | 2.4 |      |     | 7.6                         | 15.1    | C | 3.2  | 1.4 |      |     | 9.6  | 14.2 |         |
|                             | T | 4.6  | 5.4 | 11.8 |     |                             | 21.8    | T | 6.4  | 1.8 | 12.1 |     |      | 20.2 |         |

  

|                                    |                         |                                               |
|------------------------------------|-------------------------|-----------------------------------------------|
| Mutations at dG/dC:dA/dT           | 44.9 : 55.1             | 45.0 : 55.0 ( <i>p</i> = 0.95)                |
| Transitions:transversions at dG/dC | 50.3 : 49.7             | 59.8 : 40.1 ( <i>p</i> = 0.23)                |
| Transitions:transversions at dA/dT | 50.9 : 49.1             | 56.1 : 43.9 ( <i>p</i> = 0.45)                |
| Mutation frequency                 | 2.95 x 10 <sup>-3</sup> | 1.21 x 10 <sup>-3</sup> ( <i>p</i> < 0.00001) |

**Supplementary Figure 4.** Decreased somatic mutation frequency and parallel comparable reduction in mutations at dG:dC and dA:dT in the Ig H chain intronic J<sub>H</sub>4-iE<sub>μ</sub> DNA of Peyer's patch PNA<sup>hi</sup>B220<sup>+</sup> (GC) B cells from 3 12-week-old *Hoxc4*<sup>-/-</sup> mice as compare to their *Hoxc4*<sup>+/+</sup> littermates. **(a)** Numbers and nature of independent mutational events scored. **(b)** Compilations, with the numbers indicating percentages of all mutations scored in the pool of the target sequences of panels **a**. Below the compilations, the ratio of mutations at dG/dC to those at dA/dT is indicated, as is the ratio of transition:transversion substitutions at dG/dC and dA/dT.

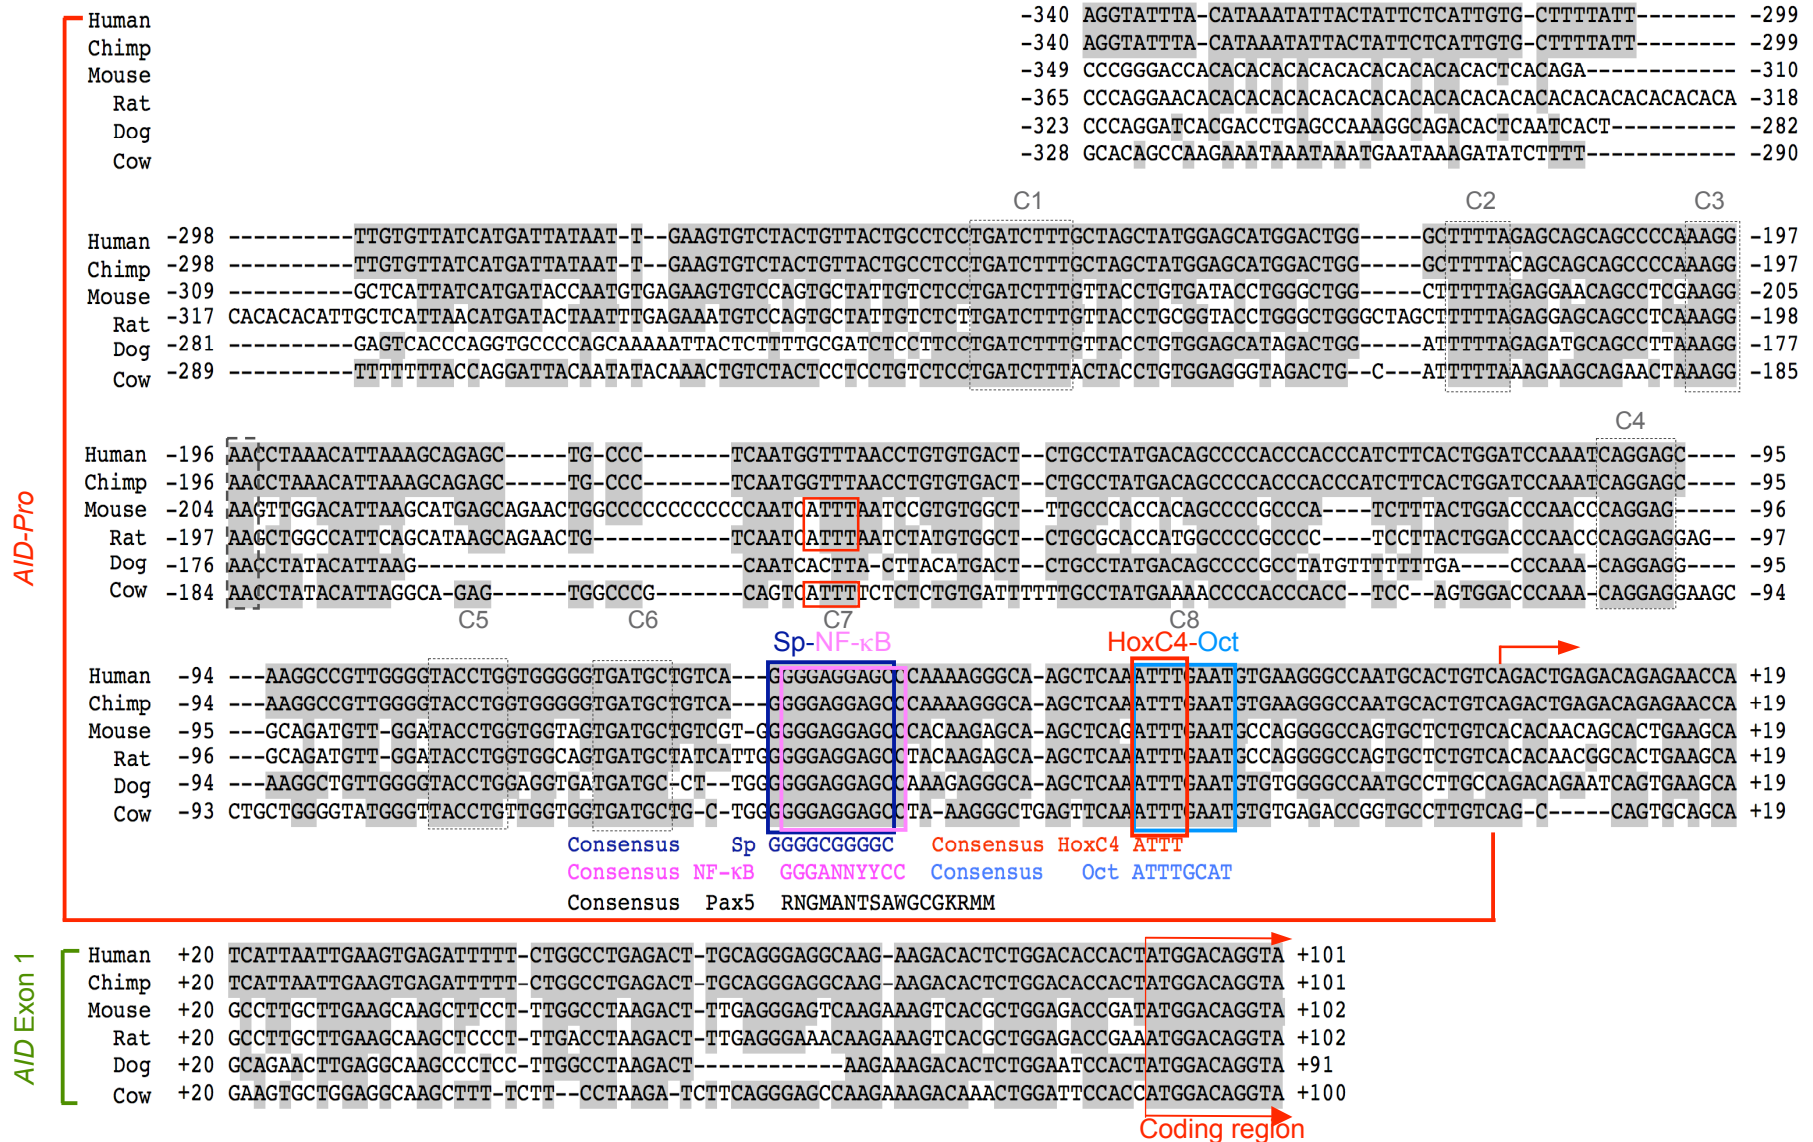

**Supplementary Figure 5.** Complete sequence of the AID gene promoter (*AID-Pro*) region in the human, chimp, mouse, rat, dog and cow. The conserved regions C1-C6 did not fulfill the minimal criteria for known transcription factor-binding sites by weight matrix search using Match™ (BIOBASE Corp., Beverly, MA) (score threshold of 0.75). The conserved HoxC4-Oct-binding 5'-ATTTGAAT-3' site is boxed in red (HoxC4)-light blue (Oct); the conserved Sp-NF-κB-binding site is boxed in dark blue (Sp)-pink (NF-κB). The consensus sequences for HoxC4-, Oct-, Sp-, NF-κB- and Pax5-binding sites are depicted in alignment with the respective conserved sites (N = A, G, C or T, Y = C or T, R = A or G, M = A or C, S = G or C, W = A or T and K = G or T). Red arrow marks the putative transcription initiation site and the beginning of the coding region. Grey marks DNA sequences conserved among the six species.

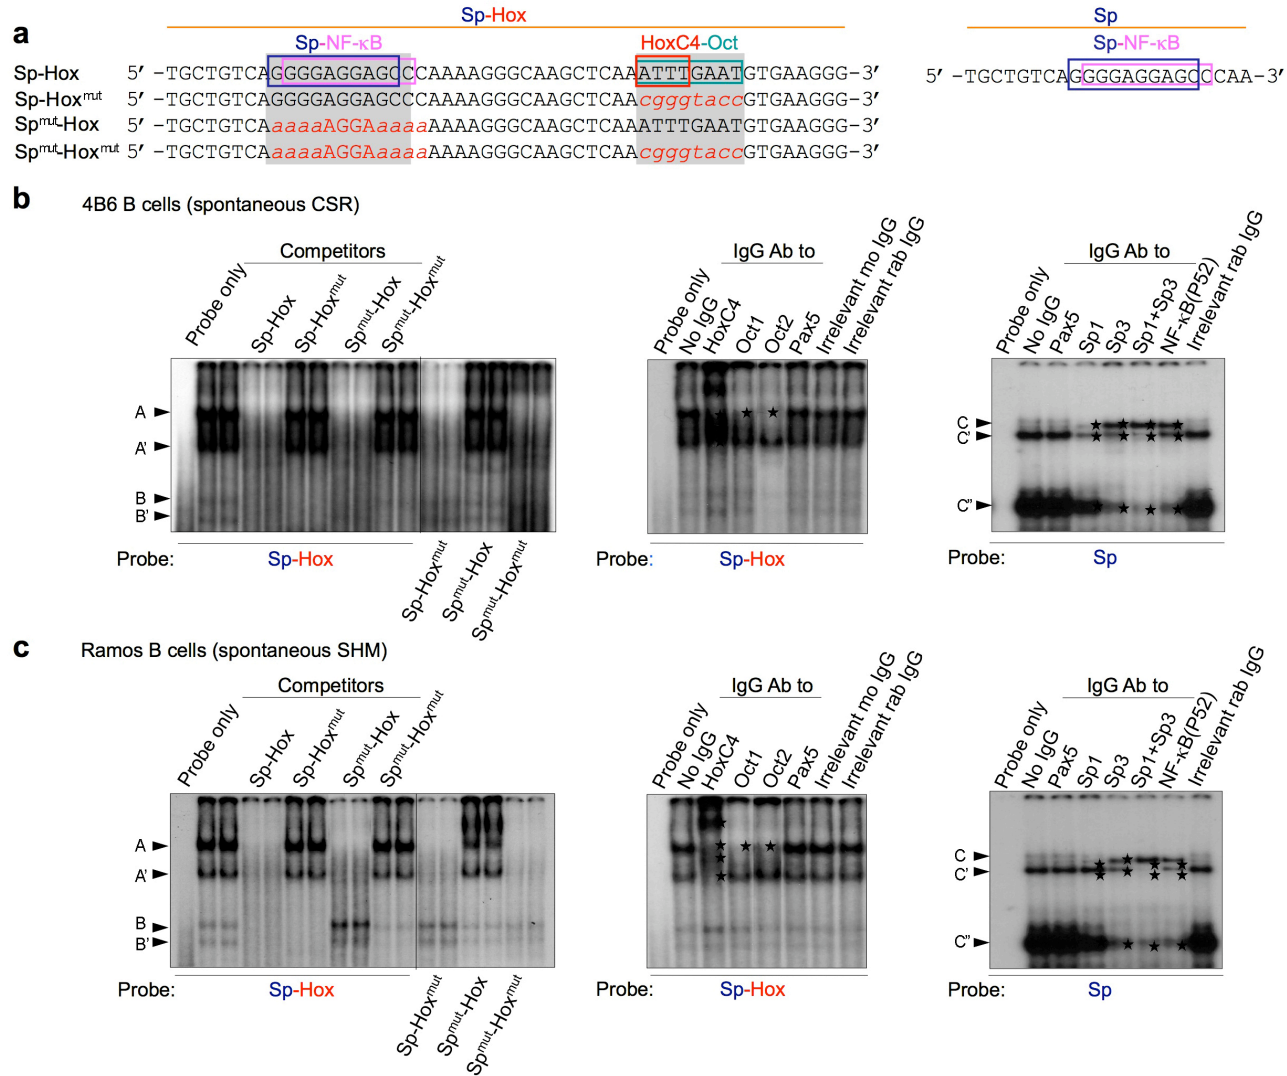

**Supplementary Figure 6.** HoxC4, Oct1 and Oct2 bind to the conserved 5'-ATTTGAAT-3' site, and Sp1, Sp3 and NF-κB bind to the conserved 5'-GGGGAGGAGCCA-3' site in the *AICDA* promoter sequence. (a) Oligonucleotides containing both the HoxC4-Oct- and the Sp-NF-κB-binding sites (Sp-Hox), or the Sp-NF-κB-binding site alone (Sp) were used as probes in EMSA, and so were the mutated oligonucleotides, in which the HoxC4-Oct- and/or Sp-NF-κB-binding sites were non-functional (Sp-Hox<sup>mut</sup>, Sp<sup>mut</sup>-Hox and Sp<sup>mut</sup>-Hox<sup>mut</sup>). Nuclear proteins from spontaneously switching 4B6 B cells (b), and spontaneously hypermutating Ramos B cells (c) specifically bound to oligonucleotide probes containing the *AICDA* promoter HoxC4-Oct- and/or Sp-NF-κB-binding sites. Efficient competition was achieved by 100-fold molar excess of the unlabeled (cold) WT Sp-Hox but not cold Sp-Hox<sup>mut</sup>, Sp<sup>mut</sup>-Hox or Sp<sup>mut</sup>-Hox<sup>mut</sup> oligonucleotide. A and A' denote protein-DNA complexes involving HoxC4-Oct; B, B' and C, C', C'' denote protein-DNA complexes involving Sp-NF-κB. The formation of the DNA-binding complexes was shifted or inhibited by a specific mAb to HoxC4, or Abs to Oct1, Oct2, Sp1, Sp3 or NF-κB (p52 subunit), but not by Ab to Pax5. Mouse or rabbit IgG with irrelevant binding activity served as a negative control.

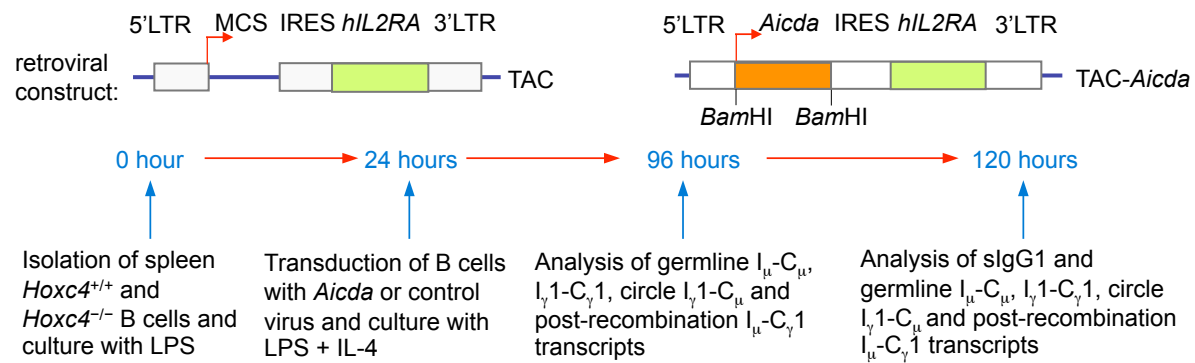

**Supplementary Figure 7. Top:** Schematics of the control TAC and AID-expression TAC-*Aicda* retroviral constructs. The *IL2RA* gene encoding human CD25 and the *Aicda* gene encoding mouse AID are indicated. LTR, long terminal repeat; MCS, multiple cloning site. **Bottom:** protocol used to transduce *Hoxc4*<sup>+/+</sup> and *Hoxc4*<sup>-/-</sup> mouse spleen B cells.



**Supplementary Table 1.** Primers for real-time qRT-PCR, semiquantitative RT-PCR, amplification of intronic J<sub>H4</sub>-iE<sub>μ</sub> DNA, *HoxC4* genotyping and ChIP assays.

|                                                                      | Forward primer                   | Reverse primer                  |
|----------------------------------------------------------------------|----------------------------------|---------------------------------|
| <b>Real-time qRT-PCR primers</b>                                     |                                  |                                 |
| <i>HoxC4</i>                                                         | 5'-CTACCTGACCCGAAGGAGAA-3'       | 5'-TGACCTCACTTTGGTGTGG-3'       |
| <i>Aicda</i>                                                         | 5'-TGCTACGTGGTGAAGAGGAG-3'       | 5'-TCCCAGTCTGAGATGTAGCG-3'      |
| <i>Gapdh</i>                                                         | 5'-TTCACCACCATGGAGAAGGC-3'       | 5'-GGCATGGACTGTGGTCATGA-3'      |
| <i>CD79b</i>                                                         | 5'-CCACACTGGTGCTGTCTTCC-3'       | 5'-GGGCTTCCTTGGAAATTCAG-3'      |
| <b>Germline transcripts</b>                                          |                                  |                                 |
| I <sub>μ</sub> -C <sub>μ</sub>                                       | 5'-ACCTGGGAATGTATGGTTGTGGCTT-3'  | 5'-TCTGAACCTTCAAGGATGCTCTTG-3'  |
| I <sub>γ3</sub> -C <sub>γ3</sub>                                     | 5'-AACTACTGCTACCACCACCACCAG-3'   | 5'-ACCAAGGGATAGACAGATGGGG-3'    |
| I <sub>γ1</sub> -C <sub>γ1</sub>                                     | 5'-TCGAGAGCCTGAGGAATGTG-3'       | 5'-ATGGAGTTAGTTTGGGCAGCA-3'     |
| I <sub>γ2b</sub> -C <sub>γ2b</sub>                                   | 5'-GATGGGGAGGAGTTGGCAGAT-3'      | 5'-CGGAGGAACCAGTTGTATC-3'       |
| I <sub>γ2a</sub> -C <sub>γ2a</sub>                                   | 5'-GCTGATGTACCTACCGAGAGA-3'      | 5'-GCTGGGCCAGGTGCTCGAGGTT-3'    |
| I <sub>ε</sub> -C <sub>ε</sub>                                       | 5'-ACTAGAGATTCACAACG-3'          | 5'-AGCGATGAATGGAGTAGC-3'        |
| I <sub>α</sub> -C <sub>α</sub>                                       | 5'-CAAGAAGGAGAAGGTGATTCAG-3'     | 5'-GAGCTGGTGGGAGTGTCAAGT-3'     |
| <b>Post-recombination transcripts</b>                                |                                  |                                 |
| I <sub>μ</sub> -C <sub>γ3</sub>                                      | 5'-CTCGGTGGCTTTGAAGGAAC-3'       | 5'-ACCAAGGGATAGACAGATGGGG-3'    |
| I <sub>μ</sub> -C <sub>γ1</sub>                                      | 5'-ACCTGGGAATGTATGGTTGTGGCTT-3'  | 5'-ATGGAGTTAGTTTGGGCAGCA-3'     |
| I <sub>μ</sub> -C <sub>γ2b</sub>                                     | 5'-ACCTGGGAATGTATGGTTGTGGCTT-3'  | 5'-CGGAGGAACCAGTTGTATC-3'       |
| I <sub>μ</sub> -C <sub>γ2a</sub>                                     | 5'-ACCTGGGAATGTATGGTTGTGGCTT-3'  | 5'-GCTGGGCCAGGTGCTCGAGGTT-3'    |
| I <sub>μ</sub> -C <sub>ε</sub>                                       | 5'-CTCGGTGGCTTTGAAGGAAC-3'       | 5'-AGCGATGAATGGAGTAGC-3'        |
| I <sub>μ</sub> -C <sub>α</sub>                                       | 5'-ACCTGGGAATGTATGGTTGTGGCTT-3'  | 5'-TAATCGTGAATCAGGCAG-3'        |
| Mature V <sub>J558</sub> DJ <sub>H</sub> -C <sub>μ</sub> transcripts | 5'-AGCCTGACATCTGAGGAC-3'         | 5'-TGGTGTGGGCAGGAAGT-3'         |
| <b>Semiquantitative RT-PCR</b>                                       |                                  |                                 |
| <i>HOXC4</i>                                                         | 5'-ATTCCAGCATCACCACCAGGAG-3'     | 5'-GGGTCAGGTAGCGGTTGTAATG-3'    |
| <i>AICDA</i>                                                         | 5'-TGCTCTTCCCTCCGCTACATCTC-3'    | 5'-AACCTCARACAGGGGCAAAGG-3'     |
| <i>GAPDH</i>                                                         | 5'-ACCAACTGCTTAGCACCCCT-3'       | 5'-CACAGTCTTCTGGGTGGCAG-3'      |
| <i>HoxC4</i>                                                         | 5'-TTCACGTTAGCACGGTGAAC-3'       | 5'-TCACTTTGGTGTGGGGAGT-3'       |
| <i>Aicda</i>                                                         | 5'-GAGGGAGTCAAGAAAGTCACGCTGGA-3' | 5'-GGCTGAGGTTAGGTTCCATCTCAG-3'  |
| Circle I <sub>γ1</sub> -C <sub>μ</sub> transcripts                   | 5'-GGCCCTTCCAGATCTTTGAG-3'       | 5'-GAAGACATTTGGGAAGGACTGAC-3'   |
| <i>Gapdh</i>                                                         | 5'-ATCACTGCCACCCAGAAGACTG-3'     | 5'-CCCTGTTGCTGTAGCCGTATTC-3'    |
| <b>Intronic J<sub>H4</sub>-iE<sub>μ</sub> DNA</b>                    |                                  |                                 |
| First round                                                          | 5'-AGCCTGACATCTGAGGAC-3'         | 5'-TCTGATCGGCCATCTTGACTC-3'     |
| Second round                                                         | 5'-CATCTGAGGACTCTGCNGTCTAT-3'    | 5'-CCTCACTCCCATTCTCGGTTAAA-3'   |
| <b>Genotyping</b>                                                    |                                  |                                 |
| <i>HoxC4</i>                                                         | 5'-AGCAAGCAACCCATAGTCTACCC-3'    | 5'-ATAACCTGGTGTATGTCCTCTGCCC-3' |
| <b>ChIP Assay</b>                                                    |                                  |                                 |
| Human <i>AICDA</i> promoter                                          | 5'-ACTGGGCTTTTAGAGCAGCA-3'       | 5'-ACAGTGCATTGGCCCTTC-3'        |
| Mouse <i>Aicda</i> promoter                                          | 5'-GGAGGCAGATGTTGGATAAC-3'       | 5'-ATATCGGTCTCCAGCGTGAC-3'      |

## Supplementary METHODS

**Immunoblotting.** B cell extracts (25 µg) were fractionated through 10% SDS-PAGE. Proteins were blotted onto polyvinylidene difluoride membranes (Bio-Rad Laboratories, Inc.) overnight (30 V) at 4 °C and then detected using primary (1:250 to 1:1000) and secondary (1:2500) Abs. After washing with PBS-Tween 20 (0.05%), bound HRP-conjugated Abs or mAbs were detected using Western Lightning<sup>®</sup> Plus-Enhanced Chemiluminescence reagents (PerkinElmer Life and Analytical Sciences, Inc.).

**NP<sub>16</sub>-CGG immunization and titration of NP-binding IgM and IgG1.** *Hoxc4*<sup>-/-</sup> and *Hoxc4*<sup>+/+</sup> C57BL/6 mice (8- to 10-week-old) that were free of obvious disease were given a first intraperitoneal injection of 100 µg of NP-CGG at a ratio of 16:1 (NP<sub>16</sub>-CGG) (Biosearch Technologies, Inc.) in Imject<sup>®</sup> alum (Pierce). After 21 d, they were boosted intraperitoneally with another 100 µg NP<sub>16</sub>-CGG in alum. Blood was collected 28 d after the primary immunization for titration of total and NP-binding IgM and IgG1 using specific ELISAs. To measure total IgM and IgG1, mouse sera were serially twofold diluted starting from 1:10,000 (for IgM) or 1:40,000 (for IgG1), and 100 µl of these were added to each of the wells and incubated at 37 °C for 1 h. After washing the plates, biotin-labeled anti-IgM or anti-IgG1 mAb was added to the wells for 1 h, and then detected using horseradish peroxidase-streptavidin, followed by OPD. The reaction was stopped with sulphuric acid after 30 min., before measuring O.D. at 492 nm. For NP<sub>30</sub>- or NP<sub>3</sub>-binding IgM and IgG1 titers, 96 well plates were coated with NP<sub>30</sub>- or NP<sub>3</sub>-BSA. Mouse sera were 1:100 then serially twofold diluted before being applied to 96-well plates. Titers were expressed in the 50% effective concentration (EC<sub>50</sub>) units. An EC<sub>50</sub> was defined as the number of dilutions needed to reach 50% of the saturation binding, as calculated using GraphPad Prism<sup>®</sup> software (GraphPad Software, Inc.). All assays were performed in triplicates.

**Histology.** Spleens from NP<sub>16</sub>-CGG immunized mice were embedded in OCT compound, snap-frozen and stored at -80 °C. Cryostat sections (7 µm) were fixed using cold acetone and stored at -80 °C for 25 min and then air-dried for 30 min at 25 °C. Phycoerythrin (PE)-labeled anti-mouse B220 mAb (clone RA3-6B2) (eBioscience Corp.) (1:200 dilution) and fluorescein isothiocyanate (FITC)-labeled peanut agglutinin (PNA) (E-Y Laboratories, Inc.) (1:100 dilution) were applied to the sections, which were kept in a dark box at 25 °C for 1 h. After washing with PBS, the sections were mounted using anti-fade reagent (Invitrogen Corp.) for examination.

**EMSA and EMSA shift assays.** Nuclear extracts from B cells were prepared using a microprocedure involving hypotonic lysis followed by high salt nuclei extraction<sup>1-3</sup>. Oligonucleotides encompassing the HoxC4-Oct and/or Sp-NF-κB *cis*-elements in *AICDA* promoter were as follows: HoxC4-Oct-Sp-NF-κB, 5'-TGCTGTCAGGGGAGGAGCCCAAAGGGCAAGCTCAAATTTGAATGTGAAGGG-3' (Sp-Hox), 5'-TGCTGTCAGGGGAGGAGCCCAAAGGGCAAGCTCAA*cgggtacc*GTGAAGGG-3' (Sp-Hox<sup>mut</sup>), 5'-TGCTGTCA*aaaa*AGGA*aaaa*AAAAGGGCAAGCTCAAATTTGAATGTGAAGGG-3' (Sp<sup>mut</sup>-Hox), 5'-TGCTGTCA*aaaa*AGGA*aaaa*AAAAGGGCAAGCTCAA*cgggtacc*GTGAAGGG-3' (Sp<sup>mut</sup>-Hox<sup>mut</sup>) and Sp-

NF- $\kappa$ B, 5'-TGCTGTCAGGGGAGGAGCCCAA-3' (Sp). All reactions were performed as reported<sup>1-3</sup>. For supershift-inhibition EMSA reactions, 5  $\mu$ g of anti-HoxC4 mouse mAb (clone 1E9) (Novus Biologicals, Inc.), anti-Oct1, anti-Oct2, anti-OcaB, anti-Pax5, anti-Sp1, anti-Sp3 or anti-NF- $\kappa$ B (p52 subunit) rabbit polyclonal Abs (Santa Cruz Biotechnology, Inc.) were pre-incubated with nuclear extracts for 30 min prior to addition of probe. All EMSA gels were 7% polyacrylamide and subjected to electrophoresis in 0.25x TBE buffer, pH 7.5. Gels were dried and exposed for autoradiography.

## REFERENCES

1. Schaffer, A., Cerutti, A., Shah, S., Zan, H. & Casali, P. The evolutionary conserved sequence upstream of the human Ig  $\gamma$ 3 region is an inducible promoter: Synergistic activation by CD40 ligand and IL-4 via cooperative NF- $\kappa$ B and STAT-6 binding sites. *J. Immunol.* **162**, 5327-5336 (1999).
2. Schaffer, A. *et al.* Selective inhibition of class switching to IgG and IgE by recruitment of the HoxC4 and Oct-1 homeodomain proteins and Ku70/Ku86 to newly identified ATTT cis-elements. *J. Biol. Chem.* **278**, 23141-23150 (2003).
3. Kim, E.C., Edmonston, C.R., Wu, X., Schaffer, A. & Casali, P. The HoxC4 homeodomain protein mediates activation of the immunoglobulin heavy chain 3' hs1,2 enhancer in human B cells. Relevance to class switch DNA recombination. *J. Biol. Chem.* **279**, 42258-42269 (2004).
